# Supplementary material for: Framework and grafted nickel ethylenediamine complexes in 2D hexagonal mesostructured templated silica
Source: Royal Society of Chemistry journal article supplement (doi:10.1039/b909759g), 2009-01-01

# Framework and grafted nickel ethylenediamine complexes in 2D hexagonal mesostructured templated silica

Wen-Juan Zhou,<sup>a,b</sup> Belén Albela,<sup>a</sup> Meigui Ou<sup>c</sup>, Pascal Perriat<sup>c</sup>, Ming-Yuan He<sup>b</sup> and Laurent Bonneviot<sup>a\*</sup>

## Electronic Supplementary Information

### Coordination of nickel ethylenediamine complexes in the framework of mesostructured templated silica using a basic route

Wen-Juan Zhou<sup>a,b</sup>, Belén Albela<sup>a</sup>, Meigui Ou<sup>c</sup>, Pascal Perriat<sup>c</sup>, Ming-Yuan He<sup>b</sup> and Laurent Bonneviot<sup>a\*</sup>

**Table S1.** UV-visible fingerprints of the complex before and after surfactant extraction according to methods *TA*, *T* and *TO*.

| n | Sample           | $\nu_2$<br>$\pm 50 \text{ cm}^{-1}$ | $\nu_3$<br>$\pm 50 \text{ cm}^{-1}$ |
|---|------------------|-------------------------------------|-------------------------------------|
|   |                  | <b>OP-Ni-3</b>                      | 17000                               |
|   | <b>OP-Ni-3TA</b> | 16900                               | 27400                               |
|   | <b>OP-Ni-3T</b>  | 15700                               | 26000                               |
|   | <b>OP-Ni-3TO</b> | 14300                               | 24450                               |

$\nu_2$  and  $\nu_3$  are the second and third d-d electronic transitions  ${}^3T_{1g}(F) \rightarrow {}^3A_{1g}(F)$  and  ${}^3T_{2g}(F) \rightarrow {}^3A_{1g}(F)$  respectively, assuming an octahedral symmetry for Ni(II), (*Scheme S1*).

**Table S2.** Nickel and silica content and molar ratios deduced from elemental analyses and weight loss from TGA.

| <b>Material</b>     | <b>Ni<sup>a</sup> wt % ± 0.1</b> | <b>SiO<sub>2</sub><sup>inorg</sup> <sup>b</sup> wt % ± 0.5</b> | <b>Surf/Si<sub>inorg</sub><sup>b,c</sup> ± 0.01</b> | <b>TMS/Si<sub>inorg</sub><sup>b</sup> ± 0.01</b> | <b>L/Si<sub>inorg</sub><sup>b</sup> ± 0.01</b> |
|---------------------|----------------------------------|----------------------------------------------------------------|-----------------------------------------------------|--------------------------------------------------|------------------------------------------------|
| <b>OP-Ni-1</b>      | 1.7                              | 47.6                                                           | 0.13                                                | -                                                | 0.03                                           |
| <b>OP-Ni-2</b>      | 1.6                              | 48.3                                                           | 0.11                                                | -                                                | 0.07                                           |
| <b>OP-Ni-3</b>      | 1.5                              | 46.8                                                           | 0.12                                                | -                                                | 0.10                                           |
| <b>OP-Ni-1TA</b>    | 2.2                              | 64.2                                                           |                                                     | 0.25                                             | 0.03                                           |
| <b>OP-Ni-2TA</b>    | 1.8                              | 61.6                                                           |                                                     | 0.22                                             | 0.07                                           |
| <b>OP-Ni-3TA</b>    | 1.9                              | 56.7                                                           |                                                     | 0.24                                             | 0.09                                           |
| <b>OP</b>           | --                               | 47.9                                                           | 0.18                                                | --                                               | --                                             |
| <b>OP-TA</b>        | --                               | 67.4                                                           |                                                     | 0.29                                             | --                                             |
| <b>LUS-PSE</b>      | --                               | 77.1                                                           |                                                     | 0.17                                             | --                                             |
| <b>LUS-MSP-Ni-2</b> | 2.5                              | 62.3                                                           |                                                     | 0.15                                             | 0.09                                           |
| <b>LUS-MSP-Ni-3</b> | 2.4                              | 56.8                                                           |                                                     | 0.12                                             | 0.12                                           |

**a:** measured by ICP-MS; **b:** pure inorganic SiO<sub>2</sub> content obtained from the residual weight in TGA at 1000°C upon subtraction of both NiO and the SiO<sub>2</sub> formed from the grafted organosilanes, “L” means ligand (AAPTMS); **c:** surfactant (Surf) content is determined from nitrogen elemental analysis.

**Table S3.** Surface area and pore volume considering different residual mass.

| <b>Material</b>     | <b>S<sub>BET</sub><sup>a</sup></b><br>(m <sup>2</sup> .g <sup>-1</sup> )±50 | <b>S<sub>BET</sub><sup>b</sup></b><br>(m <sup>2</sup> .g <sup>-1</sup> ) ±50 | <b>S<sub>BET</sub><sup>c</sup></b><br>(m <sup>2</sup> .g <sup>-1</sup> ) ±50 |
|---------------------|-----------------------------------------------------------------------------|------------------------------------------------------------------------------|------------------------------------------------------------------------------|
| <b>OP-TA</b>        | 730                                                                         | 800                                                                          | 940                                                                          |
| <b>OP-Ni-1TA</b>    | 600                                                                         | 750                                                                          | 930                                                                          |
| <b>OP-Ni-2TA</b>    | 530                                                                         | 670                                                                          | 920                                                                          |
| <b>OP-Ni-3TA</b>    | 470                                                                         | 610                                                                          | 840                                                                          |
| <b>LUS-MSP-Ni-2</b> | 600                                                                         | 788                                                                          | 982                                                                          |
| <b>LUS-MSP-Ni-3</b> | 550                                                                         | 681                                                                          | 965                                                                          |

| <b>Material</b>     | <b>V<sub>p</sub><sup>a</sup></b><br>(cm <sup>3</sup> .g <sup>-1</sup> ) ±50 | <b>V<sub>p</sub><sup>b</sup></b><br>(cm <sup>3</sup> .g <sup>-1</sup> ) ±50 | <b>V<sub>p</sub><sup>c</sup></b><br>(cm <sup>3</sup> .g <sup>-1</sup> ) ±50 |
|---------------------|-----------------------------------------------------------------------------|-----------------------------------------------------------------------------|-----------------------------------------------------------------------------|
| <b>OP-TA</b>        | 0.70                                                                        | 0.77                                                                        | 0.90                                                                        |
| <b>OP-Ni-1TA</b>    | 0.58                                                                        | 0.73                                                                        | 0.90                                                                        |
| <b>OP-Ni-2TA</b>    | 0.52                                                                        | 0.66                                                                        | 0.90                                                                        |
| <b>OP-Ni-3TA</b>    | 0.52                                                                        | 0.67                                                                        | 0.93                                                                        |
| <b>LUS-MSP-Ni-2</b> | 0.46                                                                        | 0.60                                                                        | 0.75                                                                        |
| <b>LUS-MSP-Ni-3</b> | 0.35                                                                        | 0.43                                                                        | 0.61                                                                        |

**a:** the reference mass includes all the organic and inorganic matter of the materials except water, measured after treatment of the sample at 80 °C under vacuum overnight (pre-treatment conditions of the N<sub>2</sub> sorption isotherm); **b:** includes all inorganic matter, *i.e.*, NiO and SiO<sub>2</sub> from both Ludox (inorganic) and organosilane (organic), obtained from the residual mass measured in TGA at 1000°C, *i.e.* residual SiO<sub>2</sub> and NiO; **c:** includes only inorganic silica.

**Table S4.** Parameters obtained from UV-visible for Ni(Pren)<sub>x</sub> complexes in aqueous solution.

| <b>Sample</b>          | <b><math>\nu_3</math><br/><math>\pm 50 \text{ cm}^{-1}</math></b> | <b><math>\nu_2</math><br/><math>\pm 50 \text{ cm}^{-1}</math></b> | <b><math>\Delta</math><br/><math>\pm 50 \text{ cm}^{-1}</math></b> | <b><math>\beta \pm 0.015</math></b> |
|------------------------|-------------------------------------------------------------------|-------------------------------------------------------------------|--------------------------------------------------------------------|-------------------------------------|
| <b>Solution, X = 1</b> | 26800                                                             | 16100                                                             | 9920                                                               | 0.84                                |
| <b>Solution X = 2</b>  | 27800                                                             | 17200                                                             | 10790                                                              | 0.81                                |
| <b>Solution X = 3</b>  | 27930                                                             | 17360                                                             | 10930                                                              | 0.80                                |
| <b>Solution X = 4</b>  | 28100                                                             | 17500                                                             | 11040                                                              | 0.80                                |
| <b>Solution X = 6</b>  | 28200                                                             | 17500                                                             | 11000                                                              | 0.81                                |
| <b>Solution X = 9</b>  | 28300                                                             | 17600                                                             | 11090                                                              | 0.81                                |
| <b>Solution X = 18</b> | 28300                                                             | 17600                                                             | 11090                                                              | 0.81                                |

**X**= Pren/Ni molar ratio in the solution;  **$\Delta$** : calculated crystal field considering Oh symmetry;  **$\beta$** : nephelauxetic parameter,  $\beta = B / B_0$ ; B,  $B_0$ : Racah parameters (Formula S1);  $B_0 = 1041 \text{ cm}^{-1}$  (Ni(II) free ion).

**Formula S1:**

Assuming an octahedral symmetry,  $\beta$  parameters can be determined from the following formulas: <sup>1</sup>

$$v_3/v_2 = [15B+3*\Delta+(225*B^2-18*B*\Delta+\Delta^2)^{1/2}] / [15B+3\Delta-(225B^2-18*B*\Delta+\Delta^2)^{1/2}]$$

$$v_3/B = 1/2*[15+3*\Delta/\beta + (225-18*\Delta/\beta + (\Delta/\beta)^2)^{1/2}]$$

$$v_1 = \Delta$$

**Figure S1.** UV-visible spectra of the Ni-AAPTMS complex (X=3) in aqueous solution at room temperature (a), 60 °C (b), 80 °C (c), 100 °C (d) and 130 °C (e).

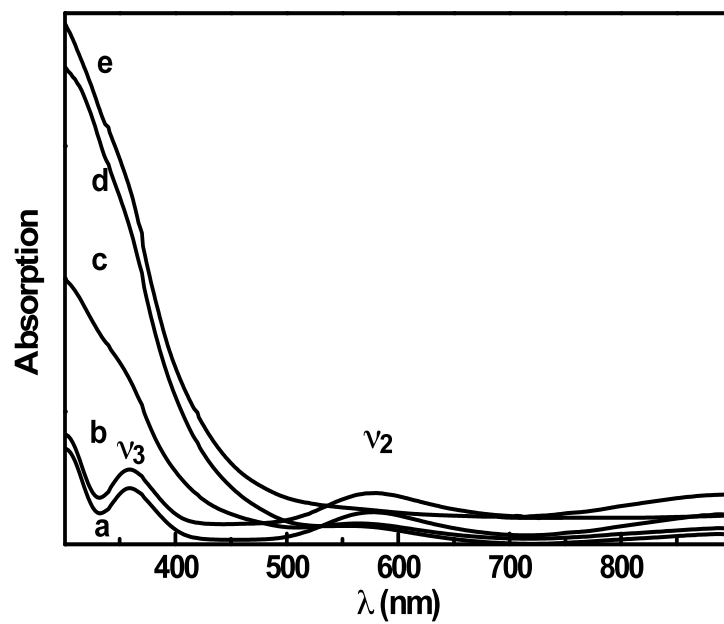

**Figure S2.** X-ray diffraction pattern of **OP**.

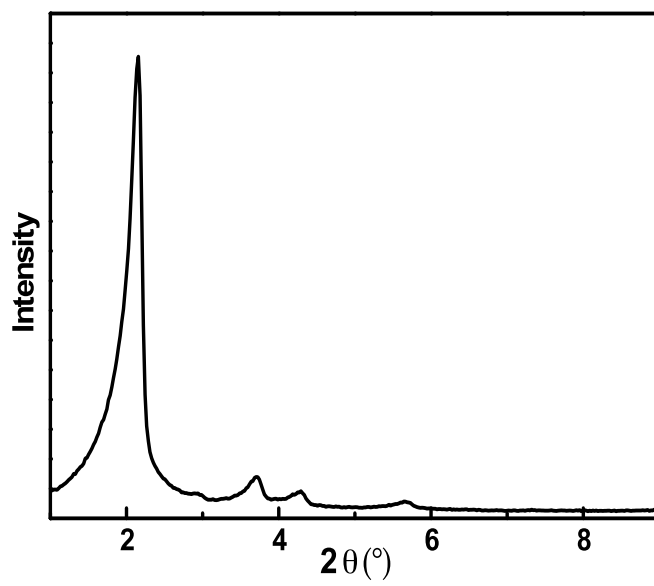

**Figure S3.** TGA diagram of **OP-Ni-3TA**, **OP-Ni-3T** and **OP-Ni-3TO**.

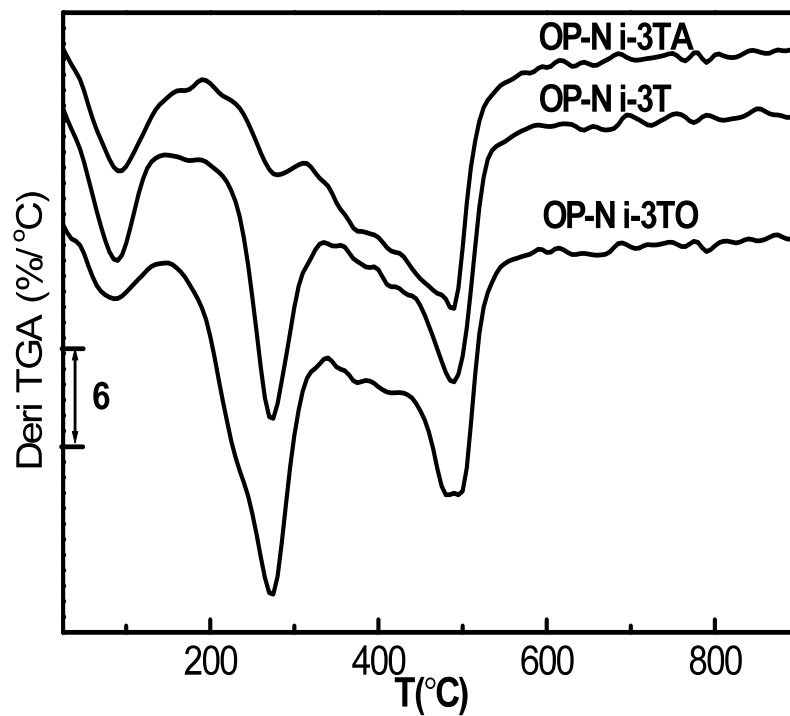



**Figure S4.** XRD patterns of **LUS-PSE** and **LUS-MSP-Ni-3**.

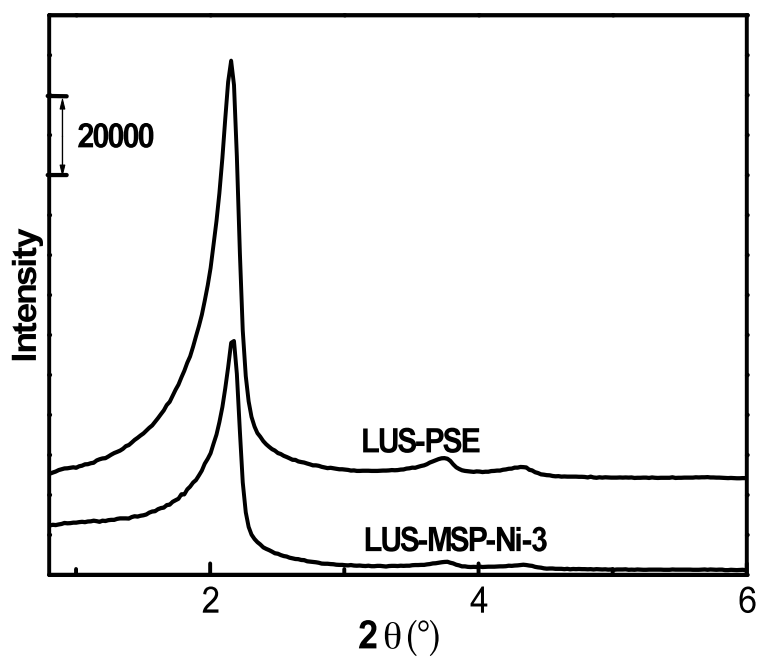

**Figure S5.** FT-IR spectra of **OP-Ni-3** and **OP-Ni-3TA** .

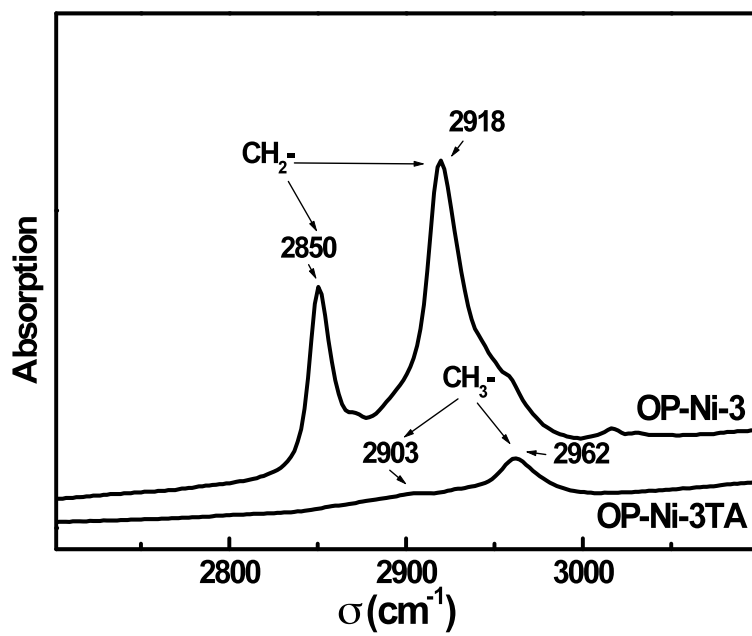

**Figure S6.** Absorption UV-visible bands of LUS-MSP-Ni-2, LUS-MSP-Ni-2H and LUS-MSP-Ni-2HCu.

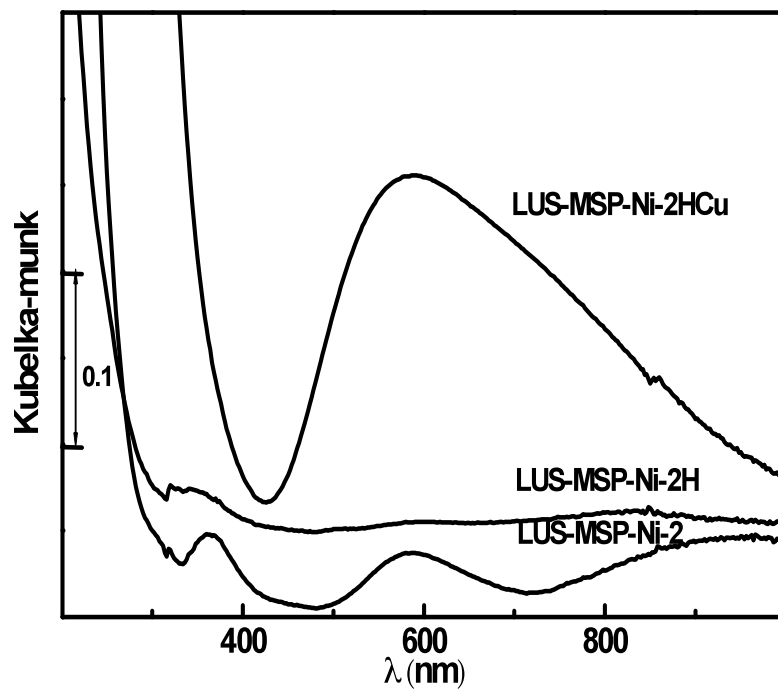

**Figure S7.** UV-visible absorption spectra of Ni complexes in solution with of different Pren to Ni molar ratios  $X = 1, 2$  and  $3$ .

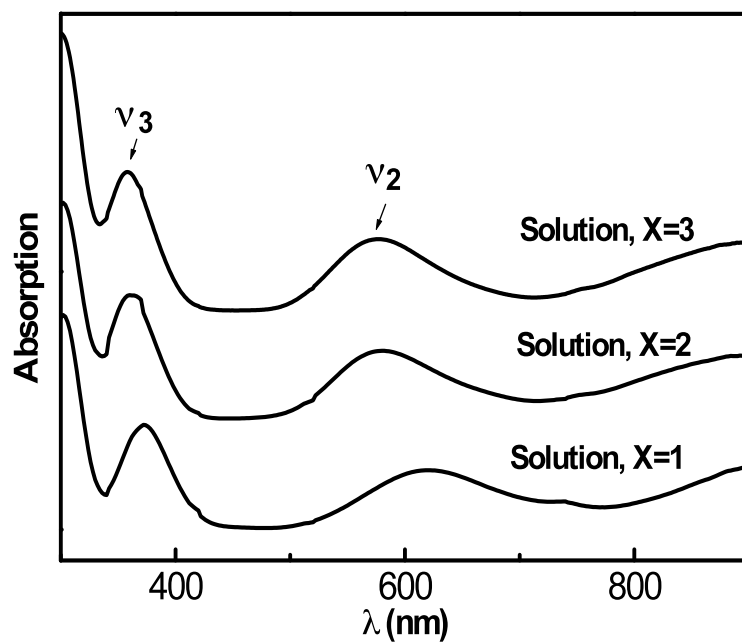

**Table S8.** UV-visible diffuse reflectance spectra of **OP-Ni-1**, **OP-Ni-2** and **OP-Ni-3**.

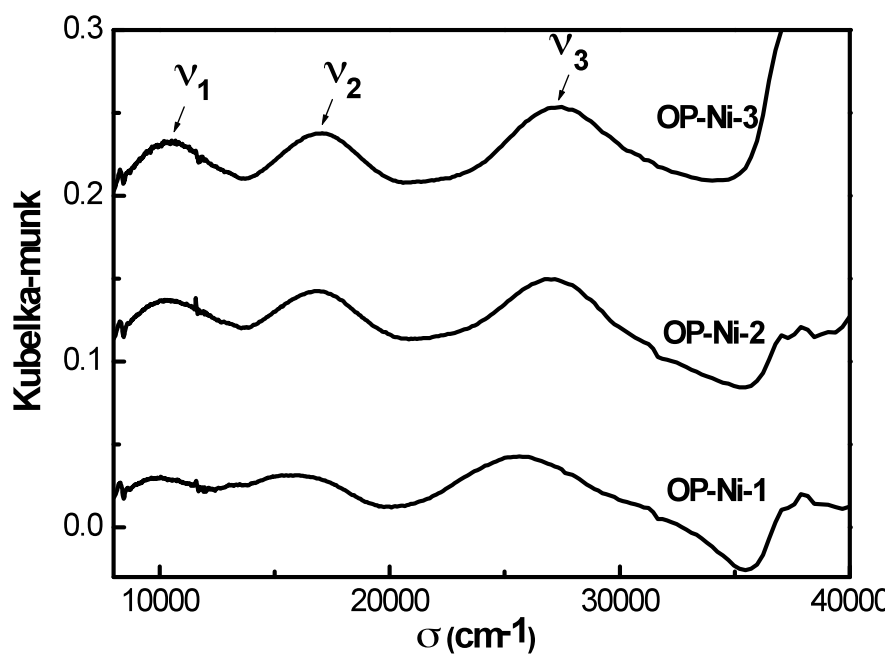

**Figure S9.** FT-IR spectrum of the precipitate  $\text{NH}_4\text{Cl}$ .

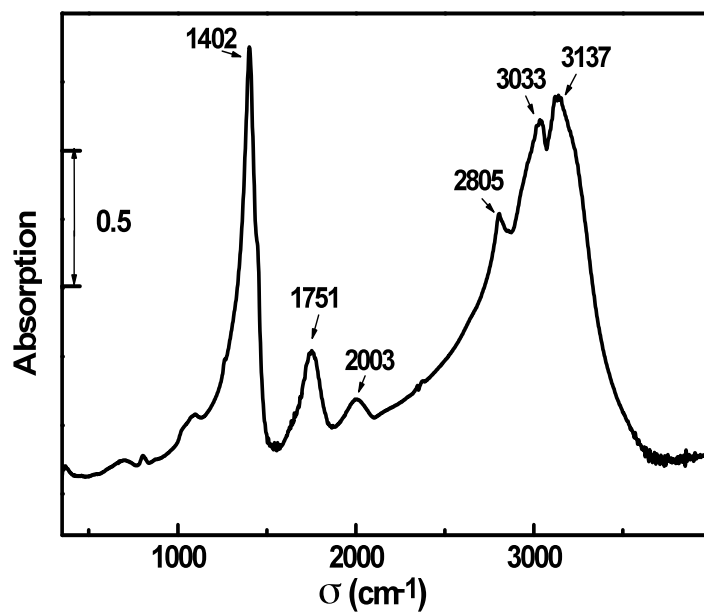

**Scheme S1.** Simplified correlation diagram between the energy levels of the Ni<sup>2+</sup> free ion (d<sup>8</sup>) and those of the same ion subjected to a crystal field of an octahedral symmetry. Solid line arrows indicate spin-allowed electronic transitions and dotted line arrows spin-forbidden ones.

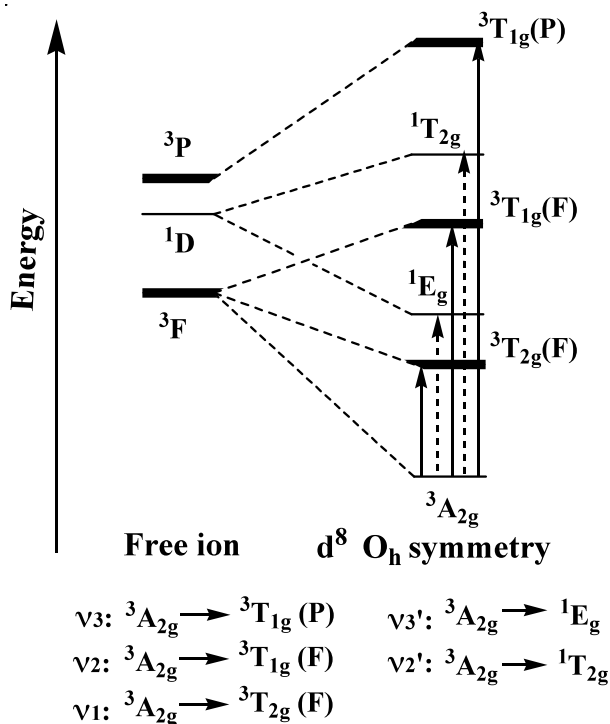

**Scheme S2** Reactions of HMDSA with silanol groups of materials (A), and CTMS with silanol groups of materials (B).

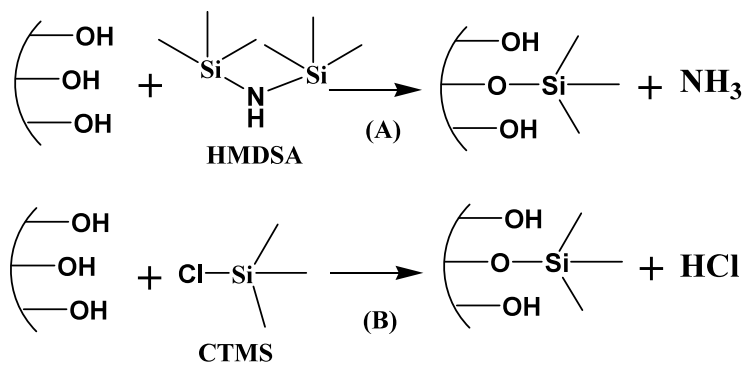

Supplement: b909759g.pdf [file b909759g.pdf]
